# Supplementary material
Source: PubMed Central journal article supplement (PMC3321827)
Supplement: 11_159_Mas_Suppl.pdf [file 11_159_Mas_Suppl.pdf]

**Supplemental Figure 2** - Taqman® RT-qPCR results obtained when comparing *DGF<sub>lo</sub>* to *DGF<sub>hi</sub>* patients. GAPDH was used as the endogenous control. The fold change was calculated using the  $\Delta\Delta C_t$  method and compared to the fold change detected in the microarray data.

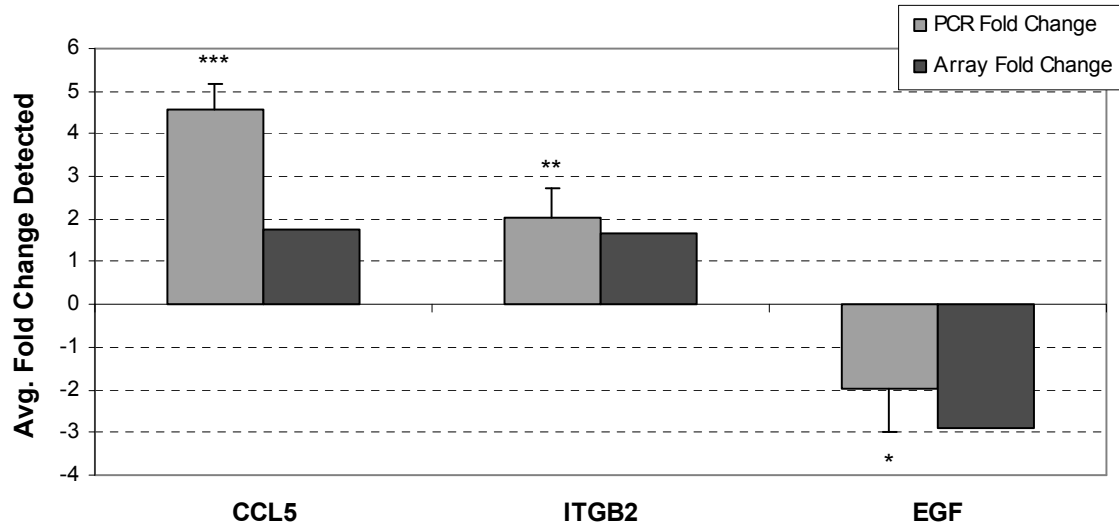

**Supplemental Figure 3** - Taqman® RT-qPCR results obtained when comparing a  $DGF_{lo}$  (n=20) to  $DGF_{hi}$  (n=15) independent set of patients. GAPDH was used as the endogenous control. The fold change was calculated using the  $\Delta\Delta C_t$  method and compared to the fold change detected in the microarray data.

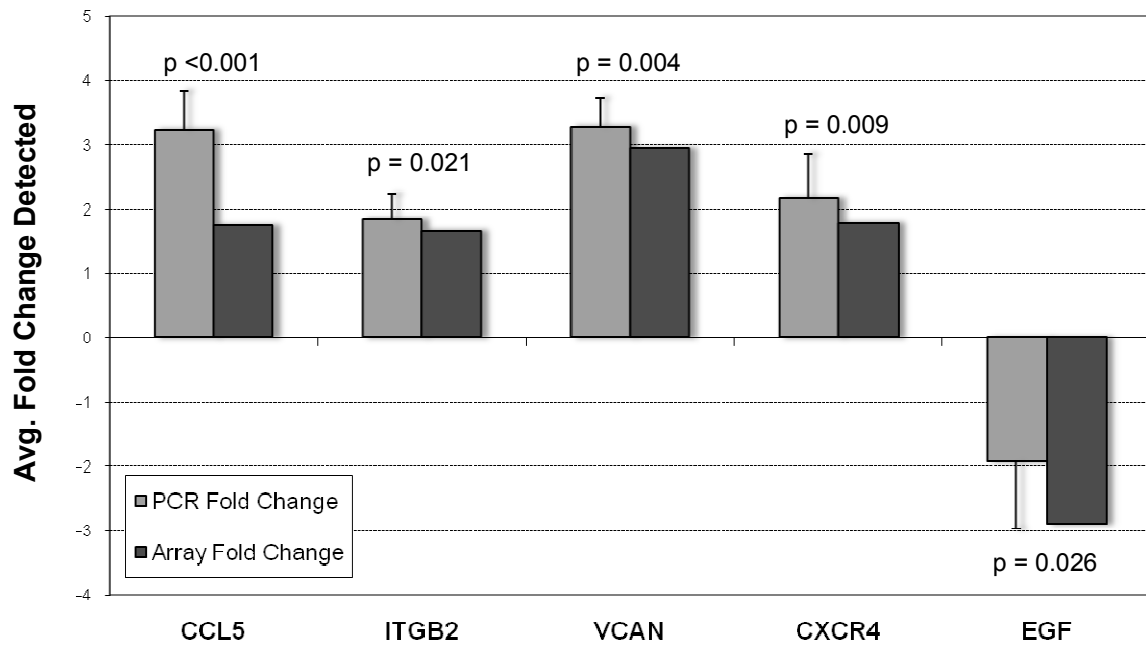

**Supplemental Table-1.** Indications for dialysis after kidney transplantation for those 25 patients with DGF

| <b>Patient Group</b> | <b>Patient ID</b> | <b>Dialysis Cause</b>  |
|----------------------|-------------------|------------------------|
| DGF-hi               | 122               | Hyperkalemia, Oliguria |
| DGF-hi               | 125               | Hyperkalemia           |
| DGF-hi               | 89                | Hyperkalemia           |
| DGF-hi               | 178               | Hyperkalemia           |
| DGF-hi               | 57                | Hyperkalemia           |
| DGF-hi               | 54                | Hyperkalemia           |
| DGF-hi               | 123               | Hyperkalemia           |
| DGF-hi               | 51                | Fluid Overload         |
| DGF-hi               | 45                | Hyperkalemia           |
| DGF-hi               | 34                | Fluid Overload         |
| DGF-hi               | 83                | Hyperkalemia           |
| DGF-hi               | 71                | Oligouria              |
| DGF-lo               | 79                | Hyperkalemia           |
| DGF-lo               | 85                | Oligouria              |
| DGF-lo               | 105               | Oligouria              |
| DGF-lo               | 64                | Hyperkalemia           |
| DGF-lo               | 50                | Uremia                 |

|        |            |                                |
|--------|------------|--------------------------------|
| DGF-lo | <b>137</b> | <b>Anuria</b>                  |
| DGF-lo | <b>3</b>   | <b>Oligouria</b>               |
| DGF-lo | <b>144</b> | <b>Oligouria</b>               |
| DGF-lo | <b>20</b>  | <b>Oligouria</b>               |
| DGF-lo | <b>80</b>  | <b>Oligouria</b>               |
| DGF-lo | <b>1</b>   | <b>Hyperkalemia, Orthopnea</b> |
| DGF-lo | <b>66</b>  | <b>Anuria</b>                  |
| DGF-lo | <b>98</b>  | <b>Oligouria</b>               |

**Supplemental Table 2-** Histological evaluation of pre-implantation biopsies classified by sub-groups

| <b>Patient Group</b>            | <b>score</b> | <b>GSC</b> | <b>IF</b> | <b>TA</b> |
|---------------------------------|--------------|------------|-----------|-----------|
| nDGF-hi<br>(number of patients) | 0            | 38         | 15        | 22        |
|                                 | 1            | 6          | 28        | 21        |
|                                 | 2            | 1          | 2         | 2         |
|                                 | 3            | 0          | 0         | 0         |
|                                 | N/A          | 6          | 6         | 6         |
|                                 | total        | 51         | 51        | 51        |
| nDGF-lo<br>(number of patients) | 0            | 11         | 4         | 9         |
|                                 | 1            | 2          | 9         | 4         |
|                                 | 2            | 0          | 0         | 0         |
|                                 | 3            | 0          | 0         | 0         |
|                                 | N/A          | 3          | 3         | 3         |
|                                 | total        | 16         | 16        | 16        |
| DGF-hi<br>(number of patients)  | 0            | 4          | 1         | 3         |

|            |           |    |    |    |
|------------|-----------|----|----|----|
| patients)  |           |    |    |    |
|            | 1         | 2  | 2  | 2  |
|            | 2         | 0  | 3  | 1  |
|            | 3         | 0  | 0  | 0  |
|            | N/A       | 4  | 4  | 4  |
|            | total     | 10 | 10 | 10 |
| DGF-lo     |           |    |    |    |
| (number of |           |    |    |    |
| patients)  | 0         | 10 | 6  | 6  |
|            | 1         | 2  | 4  | 4  |
|            | 2         | 0  | 2  | 1  |
|            | 3         | 0  | 0  | 0  |
|            | no report | 2  | 2  | 2  |
|            | other     | 0  | 0  | 1  |
|            | total     | 14 | 14 | 14 |

GS: glomerulosclerosis, IF: Interstitial fibrosis, TA: Tubular atrophy, N/A: information non-available

**Supplemental Table 3.** Differentially expressed genes when subjects were classified into two groups based on their GFR at 1 month, those having eGFR > 45 (GFR<sub>hi</sub>) and those having eGFR ≤ 45 (GFR<sub>lo</sub>).

| <b>Affymetrix ID</b> | <b>Entrez ID</b> | <b>Gene Symbol</b> | <b>P-value</b> |
|----------------------|------------------|--------------------|----------------|
| 1405_i_at            | 6352             | <b>CCL5*</b>       | 0.00934931     |
| 200095_x_at          | 6204             | RPS10              | 0.00329962     |
| 200614_at            | 1213             | CLTC               | 0.00053168     |
| 200668_s_at          | 7323             | UBE2D3             | 0.00472971     |
| 200691_s_at          | 3313             | HSPA9              | 0.00036642     |
| 200692_s_at          | 3313             | HSPA9              | 0.00209734     |
| 200738_s_at          | 5230             | PGK1               | 0.00071534     |
| 200817_x_at          | 6204             | RPS10              | 0.00576268     |
| 200883_at            | 7385             | UQCRC2             | 0.00868953     |
| 200886_s_at          | 5223             | PGAM1              | 0.00166022     |
| 201093_x_at          | 6389             | SDHA               | 0.00372287     |
| 201175_at            | 51075            | TMX2               | 0.00042242     |
| 201225_s_at          | 10250            | SRRM1              | 0.00736362     |
| 201322_at            | 506              | ATP5B              | 0.00385725     |
| 201413_at            | 3295             | HSD17B4            | 0.00854245     |
| 201519_at            | 9868             | TOMM70A            | 0.00940693     |
| 201583_s_at          | 10483            | SEC23B             | 0.00514192     |
| 201800_s_at          | 5007             | OSBP               | 0.0018375      |
| 201894_s_at          | NA               | NA                 | 0.00927171     |
| 201929_s_at          | 8502             | PKP4               | 0.00936734     |
| 201966_at            | 4720             | NDUFS2             | 0.00176994     |
| 201968_s_at          | 5236             | PGM1               | 0.00572536     |
| 202043_s_at          | 6611             | SMS                | 0.00726753     |
| 202069_s_at          | 3419             | IDH3A              | 0.00285198     |
| 202070_s_at          | 3419             | IDH3A              | 0.00874511     |
| 202119_s_at          | 8895             | CPNE3              | 0.0010619      |
| 202206_at            | 10123            | ARL4C              | 0.00504708     |
| 202207_at            | 10123            | ARL4C              | 0.00082136     |
| 202208_s_at          | 10123            | ARL4C              | 0.00119403     |
| 202237_at            | 4837             | NNMT               | 0.00508219     |
| 202508_s_at          | 6616             | SNAP25             | 0.0002881      |
| 202539_s_at          | 3156             | HMGCR              | 0.00588158     |
| 202554_s_at          | 2947             | GSTM3              | 0.0037211      |
| 202621_at            | 3661             | IRF3               | 0.00380419     |
| 202780_at            | 5019             | OXCT1              | 0.0057515      |
| 202783_at            | 23530            | NNT                | 0.00021666     |
| 202784_s_at          | 23530            | NNT                | 0.00161387     |



|             |       |               |            |
|-------------|-------|---------------|------------|
| 202803_s_at | 3689  | <b>ITGB2*</b> | 0.00856903 |
| 202825_at   | 291   | SLC25A4       | 0.00324583 |
| 203039_s_at | 4719  | NDUFS1        | 0.00454936 |
| 203116_s_at | 2235  | FECH          | 0.00425573 |
| 203207_s_at | 9650  | MTFR1         | 0.00852269 |
| 203282_at   | 2632  | GBE1          | 0.00836552 |
| 203293_s_at | 3998  | LMAN1         | 0.00510389 |
| 203485_at   | 6252  | RTN1          | 0.00796256 |
| 203538_at   | 819   | CAMLG         | 0.00812108 |
| 203641_s_at | 22837 | COBLL1        | 0.00404365 |
| 203715_at   | 6905  | TBCE          | 0.00194751 |
| 203760_s_at | 6503  | SLA           | 0.00953455 |
| 204118_at   | 962   | CD48          | 0.00981061 |
| 204175_at   | 51042 | ZNF593        | 0.00339511 |
| 204198_s_at | 864   | RUNX3         | 0.00210313 |
| 204268_at   | 6273  | S100A2        | 0.00295721 |
| 204563_at   | 6402  | SELL          | 0.00346123 |
| 204639_at   | 100   | ADA           | 0.00433585 |
| 204655_at   | 6352  | CCL5          | 0.00273541 |
| 204661_at   | 1043  | CD52          | 0.00286466 |
| 204697_s_at | 1113  | CHGA          | 0.00285271 |
| 204774_at   | 2123  | EVI2A         | 0.00977341 |
| 204786_s_at | 3455  | IFNAR2        | 0.00767579 |
| 204834_at   | 10875 | FGL2          | 0.00952643 |
| 204882_at   | 9938  | ARHGAP25      | 0.00864615 |
| 204891_s_at | 3932  | LCK           | 0.00598386 |
| 204971_at   | 1475  | CSTA          | 0.00844552 |
| 205043_at   | 1080  | CFTR          | 0.00786266 |
| 205044_at   | 2568  | GABRP         | 0.00572145 |
| 205267_at   | 5450  | POU2AF1       | 0.00031308 |
| 205614_x_at | 4485  | MST1          | 0.00900122 |
| 205624_at   | 1359  | CPA3          | 0.00540468 |
| 205683_x_at | 7177  | TPSAB1        | 0.00200423 |
| 205685_at   | 942   | CD86          | 0.00619892 |
| 205798_at   | 3575  | IL7R          | 0.00028458 |
| 205831_at   | 914   | CD2           | 0.00602706 |
| 205963_s_at | 9093  | DNAJA3        | 0.00642044 |
| 205985_x_at | 1188  | CLCNKB        | 0.00834943 |
| 206087_x_at | 3077  | HFE           | 0.00438011 |
| 206150_at   | 939   | CD27          | 0.00377333 |
| 206254_at   | 1950  | EGF           | 0.00115166 |
| 206303_s_at | 11163 | NUDT4         | 0.00451959 |
| 206336_at   | 6372  | CXCL6         | 0.00018591 |
| 206545_at   | 940   | CD28          | 0.00424974 |
| 206666_at   | 3003  | GZMK          | 0.00573883 |
| 206716_at   | 7369  | UMOD          | 0.00912289 |

|             |    |        |          |            |
|-------------|----|--------|----------|------------|
| 207047_s_at | NA |        | NA       | 0.00239907 |
| 207134_x_at |    | 64499  | TPSB2    | 0.0017317  |
| 207735_at   |    | 54941  | RNF125   | 0.00346154 |
| 207741_x_at |    | 7177   | TPSAB1   | 0.0030106  |
| 207791_s_at |    | 5861   | RAB1A    | 0.00689277 |
| 207981_s_at |    | 2104   | ESRRG    | 0.00564153 |
| 208580_x_at | NA |        | NA       | 0.00797878 |
| 208724_s_at |    | 5861   | RAB1A    | 0.00487827 |
| 208813_at   |    | 2805   | GOT1     | 0.00055531 |
| 208891_at   |    | 1848   | DUSP6    | 0.00274808 |
| 208892_s_at |    | 1848   | DUSP6    | 0.00302279 |
| 208904_s_at |    | 6234   | RPS28    | 0.00489732 |
| 208907_s_at |    | 28973  | MRPS18B  | 0.00487981 |
| 208911_s_at |    | 5162   | PDHB     | 0.00590183 |
| 208968_s_at |    | 57019  | CIAPIN1  | 0.00539367 |
| 208969_at   |    | 4704   | NDUFA9   | 0.00525061 |
| 209083_at   |    | 11151  | CORO1A   | 0.00538303 |
| 209138_x_at | NA |        | NA       | 0.00311378 |
| 209173_at   |    | 10551  | AGR2     | 0.00015254 |
| 209209_s_at |    | 10979  | FERMT2   | 0.00352973 |
| 209584_x_at |    | 27350  | APOBEC3C | 0.00288745 |
| 209670_at   |    | 28755  | TRAC     | 0.00995608 |
| 209765_at   |    | 8728   | ADAM19   | 0.005036   |
| 209835_x_at |    | 960    | CD44     | 0.00050354 |
| 209901_x_at |    | 199    | AIF1     | 0.00935336 |
| 210115_at   |    | 116832 | RPL39L   | 0.00295127 |
| 210165_at   |    | 1773   | DNASE1   | 0.00920255 |
| 210356_x_at |    | 931    | MS4A1    | 0.00692383 |
| 210716_s_at |    | 6249   | CLIP1    | 0.00384453 |
| 210889_s_at |    | 2213   | FCGR2B   | 0.00041802 |
| 210915_x_at |    | 28639  | TRBC1    | 0.0001973  |
| 210916_s_at |    | 960    | CD44     | 0.00154886 |
| 210976_s_at |    | 5213   | PFKM     | 0.00262872 |
| 211339_s_at |    | 3702   | ITK      | 0.00126831 |
| 211430_s_at | NA |        | NA       | 0.00848156 |
| 211493_x_at |    | 1837   | DTNA     | 0.00535534 |
| 211633_x_at |    | 3500   | IGHG1    | 0.00253636 |
| 211634_x_at | NA |        | NA       | 0.00171558 |
| 211637_x_at | NA |        | NA       | 0.00505071 |
| 211643_x_at | NA |        | NA       | 0.00591674 |
| 211644_x_at | NA |        | NA       | 0.00723622 |
| 211645_x_at | NA |        | NA       | 0.00071353 |
| 211663_x_at |    | 5730   | PTGDS    | 0.00522282 |
| 211742_s_at |    | 2124   | EVI2B    | 0.00837965 |
| 211796_s_at | NA |        | NA       | 0.00300092 |
| 211798_x_at |    | 28831  | IGLJ3    | 0.00588095 |

|             |    |       |          |            |
|-------------|----|-------|----------|------------|
| 211908_x_at | NA |       | NA       | 0.00844566 |
| 212014_x_at |    | 960   | CD44     | 0.00146582 |
| 212038_s_at |    | 7416  | VDAC1    | 0.00331011 |
| 212181_s_at | NA |       | NA       | 0.00125853 |
| 212294_at   |    | 55970 | GNG12    | 0.00802675 |
| 212381_at   |    | 23358 | USP24    | 0.00601349 |
| 212441_at   |    | 9778  | KIAA0232 | 0.00741631 |
| 212587_s_at |    | 5788  | PTPRC    | 0.00607012 |
| 212592_at   |    | 3512  | IGJ      | 0.00137614 |
| 212692_s_at |    | 987   | LRBA     | 0.00679148 |
| 213095_x_at |    | 199   | AIF1     | 0.00254542 |
| 213149_at   |    | 1737  | DLAT     | 0.00424718 |
| 213173_at   |    | 22990 | PCNX     | 0.00663235 |
| 213193_x_at |    | 28639 | TRBC1    | 0.00047712 |
| 213332_at   |    | 60676 | PAPPA2   | 0.00550934 |
| 213502_x_at |    | 91316 | LOC91316 | 0.00361235 |
| 213539_at   |    | 915   | CD3D     | 0.00576477 |
| 213566_at   |    | 6039  | RNASE6   | 0.00879081 |
| 213603_s_at |    | 5880  | RAC2     | 0.00541158 |
| 213812_s_at |    | 10645 | CAMKK2   | 0.00305364 |
| 214129_at   |    | 9659  | PDE4DIP  | 0.00885562 |
| 214264_s_at |    | 90141 | EFCAB11  | 0.00486989 |
| 214394_x_at |    | 1936  | EEF1D    | 0.00457685 |
| 214433_s_at |    | 8991  | SELENBP1 | 0.0058291  |
| 214669_x_at |    | 3514  | IGKC     | 0.00280714 |
| 214677_x_at | NA |       | NA       | 0.00466077 |
| 214768_x_at | NA |       | NA       | 0.0082762  |
| 214777_at   |    | 28908 | IGKV4-1  | 0.00661055 |
| 214836_x_at | NA |       | NA       | 0.00448749 |
| 215051_x_at |    | 199   | AIF1     | 0.00862536 |
| 215121_x_at | NA |       | NA       | 0.00530736 |
| 215176_x_at | NA |       | NA       | 0.00230352 |
| 215379_x_at | NA |       | NA       | 0.00240417 |
| 215772_x_at |    | 8801  | SUCLG2   | 0.00718699 |
| 215946_x_at |    | 91353 | IGLL3P   | 0.00080191 |
| 216354_at   | NA |       | NA       | 0.00935115 |
| 216380_x_at | NA |       | NA       | 0.00305384 |
| 216401_x_at | NA |       | NA       | 0.00110304 |
| 216412_x_at | NA |       | NA       | 0.00525238 |
| 216474_x_at | NA |       | NA       | 0.00253283 |
| 216510_x_at | NA |       | NA       | 0.00431737 |
| 216516_at   | NA |       | NA       | 0.00938896 |
| 216557_x_at | NA |       | NA       | 0.00737705 |
| 216560_x_at |    | 3535  | IGL@     | 0.00231689 |
| 216576_x_at | NA |       | NA       | 0.00123148 |
| 216984_x_at | NA |       | NA       | 0.00137383 |

|             |    |           |               |            |
|-------------|----|-----------|---------------|------------|
| 217022_s_at | NA |           | NA            | 0.00207962 |
| 217028_at   |    | 7852      | <b>CXCR4*</b> | 0.00141451 |
| 217147_s_at |    | 50852     | TRAT1         | 0.00629247 |
| 217148_x_at |    | 100423062 | IGLL5         | 0.00051603 |
| 217157_x_at | NA |           | NA            | 0.00540164 |
| 217235_x_at | NA |           | NA            | 0.00029551 |
| 217378_x_at | NA |           | NA            | 0.00481306 |
| 217520_x_at | NA |           | NA            | 0.00040494 |
| 217794_at   |    | 54458     | PRR13         | 0.00279905 |
| 217955_at   |    | 23786     | BCL2L13       | 0.00412831 |
| 218024_at   |    | 51660     | BRP44L        | 0.00352391 |
| 218035_s_at |    | 54502     | RBM47         | 0.00295235 |
| 218187_s_at |    | 65265     | C8orf33       | 0.0067588  |
| 218382_s_at |    | 11338     | U2AF2         | 0.00987612 |
| 218806_s_at |    | 10451     | VAV3          | 0.00348047 |
| 218960_at   |    | 56649     | TMPRSS4       | 0.00344303 |
| 219118_at   |    | 51303     | FKBP11        | 0.0086312  |
| 219257_s_at |    | 8877      | SPHK1         | 0.00996572 |
| 219675_s_at |    | 80146     | UXS1          | 0.00668708 |
| 219799_s_at |    | 10170     | DHRS9         | 0.00758731 |
| 219939_s_at |    | 7812      | CSDE1         | 0.00905973 |
| 220357_s_at |    | 10110     | SGK2          | 0.00025892 |
| 220419_s_at |    | 29761     | USP25         | 0.0018712  |
| 220999_s_at |    | 26999     | CYFIP2        | 0.00843561 |
| 221504_s_at |    | 51606     | ATP6V1H       | 0.00562381 |
| 221651_x_at | NA |           | NA            | 0.00736543 |
| 221671_x_at | NA |           | NA            | 0.00784994 |
| 221767_x_at |    | 3069      | HDLBP         | 0.00494125 |
| 221925_s_at |    | 79848     | CSPP1         | 0.00896654 |
| 34210_at    |    | 1043      | CD52          | 0.0034563  |
| 40420_at    |    | 6793      | STK10         | 0.00263086 |
| 57715_at    |    | 51063     | CALHM2        | 0.00637488 |
| 64064_at    |    | 55340     | GIMAP5        | 0.00679567 |

\* Genes validated using RT-qPCR

**Supplemental Table 4** – Complete list of differentially expressed genes identified across all comparisons. Only genes with p-values <0.01 in at least one of the comparisons have been listed.

| AffyID      | Entrez ID | Gene Symbol | nDGF <sub>lo</sub> vs nDGF <sub>hi</sub> |                  | DGF <sub>lo</sub> vs DGF <sub>hi</sub> |                  | DGF <sub>lo</sub> vs nDGF <sub>lo</sub> |                  | DGF <sub>hi</sub> vs nDGF <sub>hi</sub> |                  |
|-------------|-----------|-------------|------------------------------------------|------------------|----------------------------------------|------------------|-----------------------------------------|------------------|-----------------------------------------|------------------|
|             |           |             | p-value                                  | Avg. Fold Change | p-value                                | Avg. Fold Change | p-value                                 | Avg. Fold Change | p-value                                 | Avg. Fold Change |
| 200001_at   | 826       | CAPNS1      | 0.00547                                  | -1.31            |                                        |                  | 0.00047                                 | 1.56             |                                         |                  |
| 200059_s_at | 387       | RHOA        | 0.00171                                  | -1.15            |                                        |                  | 0.01170                                 | 1.16             |                                         |                  |
| 200065_s_at | 375       | ARF1        | 0.00092                                  | -1.22            |                                        |                  | 0.00250                                 | 1.27             |                                         |                  |
| 200600_at   | 4478      | MSN         | 0.00546                                  | -1.23            | 0.03654                                | 1.24             | 0.00129                                 | 1.37             |                                         |                  |
| 200614_at   | 1213      | CLTC        | 0.00327                                  | -1.10            |                                        |                  |                                         |                  |                                         |                  |
| 200643_at   | 3069      | HDLBP       | 0.00094                                  | -1.23            |                                        |                  | 0.00964                                 | 1.24             |                                         |                  |
| 200668_s_at | 7323      | UBE2D3      | 0.00073                                  | -1.12            |                                        |                  | 0.01774                                 | 1.11             |                                         |                  |
| 200691_s_at | 3313      | HSPA9       | 0.00097                                  | -1.32            | 0.04923                                | -1.25            |                                         |                  |                                         |                  |
| 200738_s_at | 5230      | PGK1        | 0.00268                                  | -1.10            |                                        |                  |                                         |                  |                                         |                  |
| 200764_s_at | 1495      | CTNNA1      | 0.00107                                  | -1.25            |                                        |                  | 0.01188                                 | 1.24             | 0.02338                                 | -1.18            |
| 200814_at   | 5720      | PSME1       | 0.01498                                  | -1.12            | 0.02879                                | 1.15             | 0.00056                                 | 1.23             |                                         |                  |
| 200901_s_at | 4074      | M6PR        | 0.00402                                  | -1.19            |                                        |                  | 0.00185                                 | 1.27             |                                         |                  |
| 200973_s_at | 10099     | TSPAN3      | 0.00112                                  | -1.26            |                                        |                  | 0.01170                                 | 1.26             |                                         |                  |
| 201030_x_at | 3945      | LDHB        |                                          |                  | 0.00090                                | -1.21            | 0.03382                                 | -1.12            | 0.02689                                 | 1.11             |
| 201044_x_at | 1843      | DUSP1       | 0.03044                                  | -1.21            | 0.02377                                | 1.32             | 0.00038                                 | 1.52             |                                         |                  |
| 201060_x_at | 2040      | STOM        | 0.00209                                  | -1.30            |                                        |                  | 0.00036                                 | 1.49             |                                         |                  |
| 201082_s_at | 1639      | DCTN1       | 0.00293                                  | -1.40            |                                        |                  | 0.00265                                 | 1.55             |                                         |                  |
| 201118_at   | 5226      | PGD         | 0.00094                                  | -1.31            |                                        |                  | 0.04792                                 | 1.23             |                                         |                  |
| 201137_s_at | 3115      | HLA-DPB1    |                                          |                  | 0.00003                                | 2.42             | 0.00170                                 | 1.84             | 0.03123                                 | -1.43            |
| 201175_at   | 51075     | TXNDC14     | 0.02438                                  | -1.12            | 0.03187                                | -1.16            |                                         |                  |                                         |                  |
| 201231_s_at | 2023      | ENO1        | 0.00131                                  | -1.21            |                                        |                  |                                         |                  | 0.00239                                 | -1.23            |
| 201337_s_at | 9341      | VAMP3       | 0.00134                                  | -1.41            |                                        |                  | 0.00549                                 | 1.47             |                                         |                  |
| 201444_s_at | 10159     | ATP6AP2     | 0.00036                                  | -1.25            |                                        |                  | 0.01419                                 | 1.22             |                                         |                  |
| 201445_at   | 1266      | CNN3        | 0.00153                                  | -1.69            |                                        |                  | 0.00392                                 | 1.85             |                                         |                  |
| 201519_at   | 9868      | TOMM70A     |                                          |                  | 0.00065                                | -1.29            |                                         |                  |                                         |                  |
| 201539_s_at | 2273      | FHL1        |                                          |                  | 0.00411                                | 1.39             | 0.01111                                 | 1.31             | 0.01943                                 | -1.24            |
| 201583_s_at | 10483     | SEC23B      | 0.00061                                  | -1.29            |                                        |                  |                                         |                  |                                         |                  |
| 201621_at   | 4681      | NBL1        |                                          |                  | 0.03246                                | 1.20             | 0.00064                                 | 1.31             |                                         |                  |
| 201666_at   | 7076      | TIMP1       |                                          |                  | 0.00081                                | 2.12             | 0.03323                                 | 1.55             | 0.00488                                 | -1.65            |
| 201698_s_at | 8683      | SFRS9       | 0.00152                                  | -1.20            |                                        |                  | 0.00607                                 | 1.23             |                                         |                  |
| 201716_at   | 6642      | SNX1        | 0.00148                                  | -1.25            |                                        |                  | 0.00119                                 | 1.35             |                                         |                  |

|             |       |           |         |       |         |       |         |       |         |       |
|-------------|-------|-----------|---------|-------|---------|-------|---------|-------|---------|-------|
| 201720_s_at | 7805  | LAPTM5    |         |       | 0.00169 | 1.76  | 0.00624 | 1.58  |         |       |
| 201721_s_at | 7805  | LAPTM5    |         |       | 0.00042 | 1.97  | 0.02109 | 1.50  |         |       |
| 201731_s_at | 7175  | TPR       | 0.01290 | -1.13 |         |       |         |       | 0.00405 | -1.17 |
| 201742_x_at | 6426  | SFRS1     | 0.00222 | -1.47 |         |       | 0.01271 | 1.50  | 0.04997 | -1.31 |
| 201743_at   | 929   | CD14      |         |       | 0.00077 | 2.38  | 0.02512 | 1.70  | 0.00504 | -1.78 |
| 201781_s_at | 9049  | AIP       | 0.01678 | -1.19 |         |       | 0.00078 | 1.39  |         |       |
| 201800_s_at | 5007  | OSBP      | 0.03933 | -1.10 | 0.00652 | -1.19 |         |       |         |       |
| 201841_s_at | 3315  | HSPB1     | 0.02479 | -1.31 |         |       | 0.00052 | 1.73  |         |       |
| 201929_s_at | 8502  | PKP4      | 0.00150 | -1.37 |         |       | 0.02015 | 1.34  |         |       |
| 201954_at   | 10095 | ARPC1B    |         |       | 0.00179 | 1.66  | 0.01438 | 1.44  | 0.01221 | -1.38 |
| 201988_s_at | 1389  | CREBL2    | 0.00300 | -1.23 |         |       | 0.00083 | 1.36  |         |       |
| 202101_s_at | 5899  | RALB      | 0.00158 | -1.26 |         |       | 0.00881 | 1.28  |         |       |
| 202119_s_at | 8895  | CPNE3     | 0.02131 | -1.16 | 0.00320 | -1.30 |         |       |         |       |
| 202137_s_at | 10771 | ZMYND11   | 0.00090 | -1.32 |         |       |         |       |         |       |
| 202206_at   | 10123 | ARL4C     |         |       | 0.00293 | 1.44  |         |       |         |       |
| 202207_at   | 10123 | ARL4C     |         |       | 0.00031 | 2.25  |         |       |         |       |
| 202208_s_at | 10123 | ARL4C     |         |       | 0.00391 | 1.31  |         |       |         |       |
| 202237_at   | 4837  | NNMT      |         |       | 0.00031 | 3.39  | 0.00513 | 2.39  |         |       |
| 202238_s_at | 4837  | NNMT      |         |       | 0.00012 | 3.46  | 0.00013 | 3.16  |         |       |
| 202479_s_at | 28951 | TRIB2     | 0.03524 | -1.19 |         |       |         |       | 0.00220 | -1.33 |
| 202508_s_at | 6616  | SNAP25    | 0.03226 | 1.07  | 0.00198 | 1.15  |         |       |         |       |
| 202540_s_at | 3156  | HMGCR     |         |       | 0.00655 | -1.52 | 0.00068 | -1.63 |         |       |
| 202761_s_at | 23224 | SYNE2     | 0.00105 | -1.49 |         |       | 0.00840 | 1.51  |         |       |
| 202779_s_at | 27338 | LOC731049 |         |       | 0.00315 | 1.26  | 0.01356 | 1.19  |         |       |
| 202783_at   | 23530 | NNT       | 0.01471 | -1.21 | 0.01221 | -1.32 |         |       |         |       |
| 202791_s_at | 9701  | SAPS2     | 0.00156 | -1.16 |         |       | 0.00022 | 1.26  |         |       |
| 202803_s_at | 3689  | ITGB2     |         |       | 0.00056 | 1.66  |         |       |         |       |
| 202959_at   | 4594  | MUT       |         |       | 0.00067 | -1.54 | 0.00406 | -1.40 |         |       |
| 202960_s_at | 4594  | MUT       |         |       | 0.00025 | -1.46 | 0.02966 | -1.23 |         |       |
| 202996_at   | 57804 | POLD4     |         |       |         |       | 0.00153 | 1.42  |         |       |
| 203072_at   | 4643  | MYO1E     | 0.00518 | -1.16 | 0.01527 | 1.19  | 0.00156 | 1.24  |         |       |
| 203293_s_at | 3998  | LMAN1     | 0.00065 | -1.42 |         |       |         |       |         |       |
| 203340_s_at | 8604  | SLC25A12  | 0.01723 | -1.13 |         |       |         |       | 0.01011 | -1.16 |
| 203392_s_at | 1487  | CTBP1     | 0.00540 | -1.64 |         |       | 0.00027 | 2.35  |         |       |
| 203427_at   | 25842 | ASF1A     |         |       | 0.00589 | -1.48 | 0.00278 | -1.48 |         |       |
| 203575_at   | 1459  | CSNK2A2   |         |       |         |       | 0.00780 | 1.21  |         |       |
| 203997_at   | 5774  | PTPN3     | 0.00025 | -1.24 |         |       | 0.00202 | 1.26  |         |       |

|             |           |          |         |       |         |       |         |       |         |       |
|-------------|-----------|----------|---------|-------|---------|-------|---------|-------|---------|-------|
| 204032_at   | 8412      | BCAR3    |         |       | 0.00108 | -1.57 | 0.00240 | -1.47 |         |       |
| 204034_at   | 23474     | ETHE1    |         |       |         |       | 0.00179 | 1.35  |         |       |
| 204057_at   | 3394      | IRF8     |         |       | 0.00274 | 1.62  | 0.00134 | 1.62  |         |       |
| 204118_at   | 962       | CD48     |         |       | 0.00093 | 1.53  | 0.03673 | 1.28  |         |       |
| 204156_at   | 23387     | KIAA0999 | 0.00073 | -1.38 |         |       | 0.00759 | 1.39  |         |       |
| 204198_s_at | 864       | RUNX3    |         |       | 0.00019 | 1.25  |         |       | 0.03479 | -1.10 |
| 204259_at   | 4316      | MMP7     |         |       | 0.00024 | 2.51  | 0.04390 | 1.58  | 0.02360 | -1.56 |
| 204388_s_at | 4128      | MAOA     |         |       | 0.00250 | -1.48 |         |       | 0.00170 | 1.39  |
| 204389_at   | 4128      | MAOA     |         |       | 0.00715 | -1.45 |         |       | 0.01243 | 1.32  |
| 204508_s_at | 771       | CA12     |         |       | 0.00112 | -1.43 |         |       | 0.00679 | 1.27  |
| 204655_at   | 6352      | CCL5     |         |       | 0.00056 | 1.74  |         |       |         |       |
| 204661_at   | 1043      | CD52     |         |       | 0.00006 | 1.75  | 0.00422 | 1.44  |         |       |
| 204670_x_at | 100133484 | HLA-DRB1 |         |       | 0.00327 | 1.55  | 0.00248 | 1.53  |         |       |
| 204698_at   | 3669      | ISG20    |         |       | 0.00895 | 1.44  | 0.00936 | 1.40  |         |       |
| 205012_s_at | 3029      | HAGH     |         |       | 0.04209 | -1.25 |         |       | 0.00105 | 1.34  |
| 205267_at   | 5450      | POU2AF1  | 0.00656 | 1.23  | 0.01140 | 1.31  |         |       |         |       |
| 205683_x_at | 64499     | TPSAB1   |         |       | 0.00056 | 1.52  | 0.00222 | 1.41  |         |       |
| 205769_at   | 11001     | SLC27A2  |         |       | 0.00898 | -1.57 |         |       | 0.00089 | 1.59  |
| 205776_at   | 2330      | FMO5     |         |       | 0.00137 | -2.05 |         |       | 0.00408 | 1.67  |
| 205798_at   | 3575      | IL7R     |         |       | 0.00009 | 1.93  | 0.02098 | 1.42  |         |       |
| 206042_x_at | 6638      | SNRPN    | 0.00380 | -1.21 |         |       | 0.00156 | 1.31  |         |       |
| 206045_s_at | 8715      | NOL4     | 0.00655 | 1.10  | 0.02601 | -1.12 | 0.00013 | -1.20 |         |       |
| 206085_s_at | 1491      | CTH      |         |       | 0.00910 | -1.63 |         |       | 0.00498 | 1.52  |
| 206254_at   | 1950      | EGF      |         |       | 0.00048 | -2.90 |         |       |         |       |
| 206336_at   | 6372      | CXCL6    |         |       | 0.00006 | 2.23  | 0.00114 | 1.82  |         |       |
| 206343_s_at | 3084      | NRG1     |         |       | 0.00064 | -1.76 |         |       | 0.00722 | 1.42  |
| 206392_s_at | 5918      | RARRES1  | 0.01125 | -1.77 | 0.04316 | 1.87  | 0.00085 | 2.68  |         |       |
| 206491_s_at | 8775      | NAPA     | 0.00326 | -1.24 |         |       | 0.00183 | 1.35  |         |       |
| 206666_at   | 3003      | GZMK     |         |       | 0.00428 | 1.42  |         |       |         |       |
| 206698_at   | 7504      | XK       |         |       | 0.00106 | -1.27 | 0.04316 | -1.15 | 0.00474 | 1.18  |
| 206783_at   | 2249      | FGF4     | 0.00788 | 1.14  | 0.03460 | -1.15 | 0.00027 | -1.26 |         |       |
| 207134_x_at | 64499     | TPSB2    |         |       | 0.00016 | 1.56  | 0.00195 | 1.40  |         |       |
| 207174_at   | 2262      | GPC5     |         |       | 0.00139 | -2.72 | 0.00037 | -2.84 |         |       |
| 207238_s_at | 5788      | PTPRC    |         |       | 0.00057 | 1.75  | 0.01780 | 1.42  |         |       |
| 207628_s_at | 114049    | WBSCR22  | 0.00259 | -1.18 |         |       | 0.02815 | 1.17  | 0.02293 | -1.15 |
| 207741_x_at | 7177      | TPSAB1   |         |       | 0.00428 | 1.36  |         |       |         |       |
| 207981_s_at | 2104      | ESRRG    |         |       | 0.00153 | -1.43 | 0.00299 | -1.37 |         |       |

|             |           |          |         |       |         |       |         |       |         |       |
|-------------|-----------|----------|---------|-------|---------|-------|---------|-------|---------|-------|
| 208076_at   | 121504    | HIST1H4A | 0.00053 | 1.15  |         |       | 0.00997 | -1.14 |         |       |
| 208306_x_at | 3123      | HLA-DRB1 |         |       | 0.00026 | 1.62  | 0.00092 | 1.50  |         |       |
| 208580_x_at | 121504    | HIST1H4A | 0.00292 | 1.17  |         |       |         |       | 0.03481 | 1.13  |
| 208643_s_at | 7520      | XRCC5    | 0.00173 | -1.19 |         |       |         |       | 0.03374 | -1.14 |
| 208675_s_at | 1650      | DDOST    | 0.00242 | -1.30 | 0.03525 | 1.29  | 0.00054 | 1.49  |         |       |
| 208679_s_at | 10109     | ARPC2    | 0.03776 | -1.10 | 0.00062 | 1.24  | 0.00430 | 1.18  | 0.00466 | -1.15 |
| 208680_at   | 5052      | PRDX1    | 0.00284 | -1.21 |         |       | 0.00113 | 1.31  |         |       |
| 208686_s_at | 6046      | BRD2     | 0.00433 | -1.39 |         |       | 0.00263 | 1.57  |         |       |
| 208703_s_at | 334       | APLP2    | 0.00108 | -1.50 |         |       | 0.00212 | 1.64  |         |       |
| 208729_x_at | 3106      | HLA-B    |         |       | 0.00052 | 1.71  | 0.00153 | 1.57  |         |       |
| 208811_s_at | 10049     | DNAJB6   | 0.00139 | -1.28 |         |       | 0.00755 | 1.30  |         |       |
| 208813_at   | 2805      | GOT1     | 0.00756 | -1.22 |         |       |         |       |         |       |
| 208845_at   | 7419      | VDAC3    |         |       | 0.00701 | -1.27 | 0.00017 | -1.37 |         |       |
| 208884_s_at | 51366     | UBR5     | 0.00078 | -1.23 |         |       | 0.02013 | 1.20  |         |       |
| 208887_at   | 8666      | EIF3G    |         |       | 0.00811 | 1.22  | 0.00184 | 1.25  |         |       |
| 208894_at   | 3122      | HLA-DRA  | 0.03761 | -1.28 | 0.00469 | 1.60  | 0.00038 | 1.74  |         |       |
| 208905_at   | 54205     | CYCS     |         |       | 0.00220 | -1.26 | 0.00298 | -1.23 |         |       |
| 208971_at   | 7389      | UROD     | 0.02650 | -1.14 |         |       | 0.00098 | 1.30  |         |       |
| 208973_at   | 79033     | ERI3     | 0.02221 | -1.26 |         |       | 0.00128 | 1.53  |         |       |
| 208991_at   | 6774      | STAT3    | 0.01272 | -1.24 | 0.01113 | 1.35  | 0.01958 | 1.29  | 0.00743 | -1.29 |
| 208992_s_at | 6774      | STAT3    | 0.01024 | -1.27 | 0.00521 | 1.43  | 0.00319 | 1.43  | 0.01896 | -1.27 |
| 209040_s_at | 5696      | PSMB8    |         |       | 0.00100 | 1.66  | 0.00354 | 1.52  | 0.03151 | -1.30 |
| 209073_s_at | 8650      | NUMB     | 0.00194 | -1.25 |         |       | 0.00043 | 1.39  |         |       |
| 209138_x_at | 3535      | IGL@     |         |       | 0.00019 | 5.34  | 0.02785 | 2.45  |         |       |
| 209140_x_at | 3106      | HLA-B    |         |       | 0.00207 | 1.43  | 0.00377 | 1.37  |         |       |
| 209173_at   | 10551     | AGR2     | 0.00224 | 1.72  | 0.04424 | 1.64  |         |       |         |       |
| 209209_s_at | 10979     | FERMT2   | 0.00118 | -1.32 |         |       |         |       |         |       |
| 209217_s_at | 11152     | WDR45    |         |       |         |       | 0.00085 | 1.31  |         |       |
| 209312_x_at | 100133484 | HLA-DRB1 |         |       | 0.00025 | 1.81  | 0.00088 | 1.64  | 0.03948 | -1.30 |
| 209417_s_at | 3430      | IFI35    | 0.02891 | -1.26 |         |       | 0.00076 | 1.61  |         |       |
| 209480_at   | 3119      | HLA-DQB1 |         |       | 0.00490 | 3.02  | 0.00539 | 2.77  |         |       |
| 209584_x_at | 27350     | APOBEC3C | 0.02617 | 1.13  | 0.01022 | 1.21  |         |       |         |       |
| 209625_at   | 5283      | PIGH     |         |       | 0.00049 | -1.40 |         |       | 0.02731 | 1.18  |
| 209712_at   | 23169     | SLC35D1  |         |       | 0.01522 | -1.40 |         |       | 0.00630 | 1.36  |
| 209795_at   | 969       | CD69     |         |       | 0.00171 | 1.56  | 0.00889 | 1.41  |         |       |
| 209835_x_at | 960       | CD44     | 0.03016 | 1.19  | 0.00102 | 1.45  |         |       |         |       |
| 210006_at   | 25864     | ABHD14A  |         |       | 0.00342 | -1.52 |         |       | 0.00109 | 1.45  |



|             |        |                  |         |       |         |       |         |       |         |       |
|-------------|--------|------------------|---------|-------|---------|-------|---------|-------|---------|-------|
| 210072_at   | 6363   | CCL19            |         |       | 0.00043 | 3.74  |         |       |         |       |
| 210084_x_at | 7177   | TPSAB1           |         |       | 0.00069 | 1.48  | 0.00213 | 1.39  |         |       |
| 210115_at   | 116832 | RPL39L           | 0.00044 | 1.14  |         |       | 0.03608 | -1.10 |         |       |
| 210397_at   | 1672   | DEFB1            |         |       | 0.00446 | -1.44 | 0.00079 | -1.50 |         |       |
| 210402_at   | 3758   | KCNJ1            |         |       | 0.00414 | -1.48 | 0.01085 | -1.39 |         |       |
| 210640_s_at | 2852   | GPER             |         |       | 0.00248 | -1.36 |         |       | 0.00014 | 1.37  |
| 210732_s_at | 3964   | LGALS8           | 0.00715 | -1.26 |         |       |         |       | 0.00327 | -1.33 |
| 210764_s_at | 3491   | CYR61            |         |       | 0.00055 | 2.00  | 0.01482 | 1.56  | 0.02471 | -1.43 |
| 210889_s_at | 2213   | FCGR2B           |         |       | 0.00026 | 1.87  |         |       |         |       |
| 210915_x_at | 28639  | TRBC1            |         |       | 0.00004 | 1.81  | 0.04606 | 1.29  |         |       |
| 210916_s_at | 960    | CD44             |         |       | 0.00402 | 1.21  |         |       |         |       |
| 210978_s_at | 8407   | TAGLN2           | 0.03012 | -1.32 | 0.00381 | 1.69  | 0.00480 | 1.61  | 0.02322 | -1.39 |
| 210982_s_at | 3122   | HLA-DRA          |         |       | 0.00260 | 1.64  | 0.00037 | 1.73  |         |       |
| 210992_x_at | 9103   | FCGR2C           |         |       | 0.00183 | 1.36  | 0.00322 | 1.31  |         |       |
| 211395_x_at | 9103   | FCGR2C           |         |       | 0.00020 | 1.52  | 0.00104 | 1.41  |         |       |
| 211430_s_at | 28396  | IGH@             |         |       | 0.00061 | 6.08  | 0.02882 | 2.86  |         |       |
| 211529_x_at | 3135   | HLA-G            |         |       | 0.00363 | 1.39  | 0.00218 | 1.39  |         |       |
| 211530_x_at | 3135   | HLA-G            |         |       | 0.00132 | 1.36  | 0.00768 | 1.27  |         |       |
| 211644_x_at | 28875  | IGK@             |         |       | 0.00260 | 2.74  | 0.04874 | 1.83  |         |       |
| 211645_x_at | 0      | Affy_211645_x_at |         |       | 0.00044 | 3.53  |         |       |         |       |
| 211654_x_at | 3119   | HLA-DQB1         |         |       | 0.00025 | 2.28  | 0.00011 | 2.26  |         |       |
| 211749_s_at | 9341   | VAMP3            | 0.00030 | -1.26 |         |       | 0.00148 | 1.30  |         |       |
| 211755_s_at | 515    | ATP5F1           |         |       | 0.00162 | -1.26 | 0.00629 | -1.20 |         |       |
| 211796_s_at | 28638  | TRBC1            |         |       | 0.00044 | 1.74  | 0.01185 | 1.44  |         |       |
| 211798_x_at | 28831  | IGLJ3            |         |       | 0.00234 | 1.99  | 0.04677 | 1.51  |         |       |
| 211799_x_at | 3107   | HLA-C            |         |       | 0.00198 | 1.56  | 0.00161 | 1.52  |         |       |
| 211864_s_at | 26509  | MYOF             |         |       | 0.00637 | 1.55  |         |       | 0.00086 | -1.55 |
| 211911_x_at | 3106   | HLA-B            |         |       | 0.00090 | 1.66  | 0.00051 | 1.65  |         |       |
| 211991_s_at | 3113   | HLA-DPA1         |         |       | 0.00108 | 1.98  | 0.00252 | 1.80  |         |       |
| 212008_at   | 23190  | UBXN4            | 0.00117 | -1.41 |         |       | 0.02053 | 1.37  |         |       |
| 212014_x_at | 960    | CD44             | 0.04942 | 1.13  | 0.00312 | 1.30  |         |       |         |       |
| 212025_s_at | 2314   | FLII             | 0.00183 | -1.33 |         |       | 0.00113 | 1.47  |         |       |
| 212181_s_at | 11163  | NUDT4            | 0.03382 | -1.22 | 0.00661 | -1.43 |         |       |         |       |
| 212196_at   | 3572   | IL6ST            | 0.00249 | -1.30 |         |       | 0.01447 | 1.31  | 0.04688 | -1.21 |
| 212281_s_at | 27346  | TMEM97           |         |       |         |       | 0.00121 | -2.01 |         |       |
| 212282_at   | 27346  | TMEM97           |         |       |         |       | 0.00172 | -1.78 |         |       |
| 212381_at   | 23358  | USP24            | 0.03907 | -1.21 |         |       |         |       |         |       |

|             |           |                |         |       |         |       |         |       |         |       |
|-------------|-----------|----------------|---------|-------|---------|-------|---------|-------|---------|-------|
| 212422_at   | 22984     | PDCD11         |         |       | 0.00999 | 1.15  |         |       | 0.00009 | -1.19 |
| 212510_at   | 23171     | GPD1L          |         |       | 0.00019 | -1.51 |         |       | 0.00845 | 1.26  |
| 212568_s_at | 1737      | DLAT           |         |       | 0.01125 | -1.36 | 0.02402 | -1.29 |         |       |
| 212584_at   | 9716      | AQR            | 0.00159 | -1.16 |         |       | 0.03833 | 1.13  |         |       |
| 212587_s_at | 5788      | PTPRC          |         |       | 0.00023 | 2.44  |         |       |         |       |
| 212588_at   | 5788      | PTPRC          |         |       | 0.00063 | 2.68  | 0.04733 | 1.68  |         |       |
| 212592_at   | 3512      | IGJ            |         |       | 0.00031 | 5.70  | 0.01997 | 2.78  |         |       |
| 212796_s_at | 23102     | TBC1D2B        |         |       | 0.00174 | 1.35  | 0.00911 | 1.26  | 0.02613 | -1.19 |
| 212914_at   | 23492     | CBX7           |         |       |         |       | 0.00191 | 1.35  |         |       |
| 212998_x_at | 3119      | HLA-DQB1       |         |       | 0.00262 | 2.43  | 0.00355 | 2.23  |         |       |
| 212999_x_at | 3119      | HLA-DQB1       |         |       | 0.00167 | 2.20  | 0.00157 | 2.09  |         |       |
| 213149_at   | 1737      | DLAT           |         |       | 0.00131 | -1.48 | 0.00587 | -1.36 |         |       |
| 213193_x_at | 28639     | TRBC1          |         |       | 0.00084 | 1.39  |         |       |         |       |
| 213321_at   | 594       | BCKDHB         |         |       | 0.00006 | -1.59 |         |       | 0.00105 | 1.35  |
| 213502_x_at | 91316     | LOC91316       |         |       | 0.00280 | 1.87  |         |       |         |       |
| 213539_at   | 915       | CD3D           |         |       | 0.00047 | 1.46  | 0.04080 | 1.22  |         |       |
| 213603_s_at | 5880      | RAC2           |         |       | 0.00012 | 1.76  | 0.04786 | 1.30  | 0.04116 | -1.26 |
| 213831_at   | 3117      | HLA-DQA1       |         |       | 0.00669 | 3.00  | 0.00298 | 3.09  |         |       |
| 213872_at   | 0         | Affy_213872_at | 0.00263 | -1.61 |         |       | 0.01504 | 1.64  |         |       |
| 214023_x_at | 347733    | TUBB2B         |         |       | 0.01390 | -1.77 | 0.00117 | -2.03 |         |       |
| 214073_at   | 2017      | CTTN           | 0.00419 | 1.37  | 0.03107 | -1.39 |         |       | 0.00107 | 1.50  |
| 214164_x_at | 771       | CA12           |         |       | 0.00005 | -1.38 | 0.01195 | -1.20 | 0.00356 | 1.20  |
| 214359_s_at | 3326      | HSP90AB1       | 0.00237 | -1.42 |         |       | 0.00253 | 1.57  |         |       |
| 214382_at   | 54346     | UNC93A         | 0.00883 | 1.19  | 0.02930 | -1.22 | 0.00090 | -1.33 |         |       |
| 214505_s_at | 2273      | FHL1           | 0.03780 | -1.21 | 0.00735 | 1.42  | 0.00348 | 1.43  |         |       |
| 214669_x_at | 3514      | IGKC           |         |       | 0.00023 | 3.92  | 0.01977 | 2.20  |         |       |
| 214677_x_at | 3535      | IGL@           |         |       | 0.00027 | 6.02  | 0.02687 | 2.70  |         |       |
| 214777_at   | 28908     | IGKV4-1        |         |       | 0.00181 | 2.20  |         |       |         |       |
| 214836_x_at | 3514      | IGKC           |         |       | 0.00053 | 2.76  | 0.02017 | 1.86  |         |       |
| 214875_x_at | 334       | APLP2          | 0.00103 | -1.39 |         |       | 0.00425 | 1.45  |         |       |
| 215121_x_at | 28815     | IGL@           |         |       | 0.00033 | 4.51  | 0.02521 | 2.35  |         |       |
| 215176_x_at | 100130100 | LOC100130100   |         |       | 0.00038 | 4.37  | 0.02234 | 2.38  |         |       |
| 215185_at   | 0         | Affy_215185_at |         |       | 0.00118 | 1.44  | 0.01426 | 1.29  |         |       |
| 215193_x_at | 100133484 | HLA-DRB1       |         |       | 0.00018 | 1.86  | 0.00038 | 1.73  |         |       |
| 215207_x_at | 11049     | LOC646208      | 0.00084 | -1.23 |         |       | 0.00334 | 1.26  |         |       |
| 215343_at   | 440193    | CCDC88C        |         |       | 0.03190 | -1.22 |         |       | 0.00083 | 1.29  |
| 215379_x_at | 28815     | IGL@           |         |       | 0.00017 | 4.69  | 0.01988 | 2.39  |         |       |

|             |           |                |         |       |         |       |         |       |         |       |
|-------------|-----------|----------------|---------|-------|---------|-------|---------|-------|---------|-------|
| 215399_s_at | 10956     | OS9            | 0.01030 | -1.20 |         |       | 0.00103 | 1.35  |         |       |
| 215489_x_at | 9454      | HOMER3         |         |       | 0.00265 | 1.83  | 0.01398 | 1.58  |         |       |
| 215646_s_at | 1462      | VCAN           |         |       | 0.00099 | 2.94  |         |       | 0.01282 | -1.91 |
| 215785_s_at | 26999     | CYFIP2         |         |       | 0.01358 | -1.50 | 0.01896 | -1.43 |         |       |
| 215867_x_at | 771       | CA12           |         |       | 0.00028 | -1.34 | 0.01524 | -1.20 | 0.01402 | 1.17  |
| 215946_x_at | 91353     | IGLL3          |         |       | 0.00030 | 2.71  | 0.03235 | 1.71  |         |       |
| 215952_s_at | 4946      | OAZ1           | 0.00520 | -1.21 |         |       | 0.00097 | 1.34  |         |       |
| 215987_at   | 9693      | RAPGEF2        |         |       |         |       | 0.00145 | -1.12 |         |       |
| 216041_x_at | 2896      | GRN            | 0.03332 | -1.23 | 0.01043 | 1.43  | 0.00227 | 1.49  |         |       |
| 216401_x_at | 652493    | LOC652493      |         |       | 0.00110 | 2.68  |         |       |         |       |
| 216474_x_at | 64499     | TPSAB1         |         |       | 0.00019 | 1.60  | 0.01044 | 1.34  |         |       |
| 216516_at   | 0         | Affy_216516_at | 0.00066 | 1.10  |         |       | 0.02506 | -1.08 |         |       |
| 216576_x_at | 28299     | IGKC           |         |       | 0.00091 | 2.96  |         |       |         |       |
| 216593_s_at | 5279      | PIGC           | 0.01996 | -1.12 |         |       |         |       | 0.00318 | -1.17 |
| 216640_s_at | 10130     | PDIA6          | 0.00305 | -1.33 |         |       | 0.00307 | 1.44  |         |       |
| 216697_at   | 7204      | TRIO           |         |       |         |       |         |       | 0.00080 | -1.10 |
| 216755_at   | 114884    | OSBPL10        | 0.00552 | 1.16  |         |       | 0.00182 | -1.25 |         |       |
| 216984_x_at | 28813     | IGLV2-11       |         |       | 0.00131 | 2.00  |         |       |         |       |
| 217022_s_at | 100126583 | IGH@           |         |       | 0.00008 | 6.43  | 0.01432 | 2.86  |         |       |
| 217028_at   | 7852      | CXCR4          |         |       | 0.00974 | 1.78  |         |       |         |       |
| 217148_x_at | 3535      | IGL@           |         |       | 0.00039 | 2.30  | 0.02411 | 1.62  |         |       |
| 217235_x_at | 28813     | IGL@           |         |       | 0.00084 | 1.72  |         |       |         |       |
| 217294_s_at | 2023      | ENO1           | 0.00368 | -1.50 | 0.03353 | 1.51  |         |       | 0.00231 | -1.61 |
| 217356_s_at | 5230      | PGK1           | 0.00020 | -1.30 |         |       | 0.01859 | 1.24  |         |       |
| 217456_x_at | 3133      | HLA-E          |         |       | 0.00049 | 1.47  | 0.00843 | 1.31  | 0.03561 | -1.20 |
| 217478_s_at | 3108      | HLA-DMA        |         |       | 0.00037 | 1.76  | 0.00270 | 1.55  |         |       |
| 217520_x_at | 731884    | LOC731884      | 0.00247 | 1.22  |         |       |         |       |         |       |
| 217747_s_at | 6203      | RPS9           |         |       | 0.00032 | 1.38  | 0.03496 | 1.19  | 0.01441 | -1.19 |
| 217750_s_at | 65264     | UBE2Z          |         |       | 0.00774 | 1.23  | 0.00106 | 1.27  |         |       |
| 217774_s_at | 51504     | HSPC152        |         |       |         |       | 0.00085 | 1.25  |         |       |
| 217794_at   | 54458     | PRR13          | 0.00408 | -1.16 |         |       |         |       |         |       |
| 217839_at   | 10342     | TFG            | 0.00052 | -1.17 |         |       | 0.00600 | 1.17  |         |       |
| 217871_s_at | 284889    | LOC284889      |         |       |         |       | 0.00215 | 1.28  |         |       |
| 217993_s_at | 27430     | MAT2B          | 0.01428 | -1.13 |         |       | 0.01939 | 1.17  | 0.01256 | 1.15  |
| 218024_at   | 51660     | BRP44L         |         |       | 0.00010 | -1.41 | 0.00381 | -1.27 |         |       |
| 218027_at   | 29088     | MRPL15         |         |       | 0.00735 | -1.22 | 0.00296 | -1.23 |         |       |
| 218074_at   | 51647     | FAM96B         | 0.04935 | -1.13 |         |       | 0.00270 | 1.27  |         |       |

|             |       |          |         |       |         |       |         |       |         |       |
|-------------|-------|----------|---------|-------|---------|-------|---------|-------|---------|-------|
| 218170_at   | 51015 | ISOC1    |         |       | 0.00087 | -1.44 | 0.01884 | -1.27 |         |       |
| 218192_at   | 51447 | IP6K2    | 0.00120 | -1.17 | 0.03921 | 1.15  | 0.00092 | 1.24  |         |       |
| 218546_at   | 79762 | C1orf115 |         |       | 0.00031 | -1.38 |         |       | 0.00013 | 1.32  |
| 218568_at   | 55750 | AGK      |         |       | 0.00455 | -1.42 | 0.00547 | -1.37 |         |       |
| 218772_x_at | 55151 | TMEM38B  |         |       | 0.00171 | -1.63 | 0.00993 | -1.45 |         |       |
| 219076_s_at | 5827  | PXMP2    |         |       | 0.00015 | -1.90 | 0.01582 | -1.45 | 0.01229 | 1.39  |
| 219118_at   | 51303 | FKBP11   |         |       | 0.00074 | 1.66  | 0.01835 | 1.39  |         |       |
| 219195_at   | 10891 | PPARGC1A |         |       | 0.04228 | -1.32 | 0.00564 | -1.43 |         |       |
| 220099_s_at | 51631 | LUC7L2   | 0.00125 | -1.20 |         |       | 0.00721 | 1.21  |         |       |
| 220357_s_at | 10110 | SGK2     | 0.03656 | -1.13 | 0.00452 | -1.27 |         |       |         |       |
| 220532_s_at | 28959 | TMEM176B | 0.00318 | -1.37 |         |       | 0.00254 | 1.53  |         |       |
| 221523_s_at | 58528 | RRAGD    |         |       | 0.00281 | -1.72 | 0.00025 | -1.88 |         |       |
| 221524_s_at | 58528 | RRAGD    |         |       |         |       | 0.00092 | -1.56 |         |       |
| 221581_s_at | 7462  | LAT2     |         |       | 0.00083 | 1.31  | 0.04917 | 1.15  | 0.04673 | -1.13 |
| 221589_s_at | 4329  | ALDH6A1  |         |       | 0.01170 | -1.51 |         |       | 0.00045 | 1.60  |
| 221601_s_at | 9214  | FAIM3    |         |       | 0.00105 | 1.42  | 0.01706 | 1.27  |         |       |
| 221627_at   | 10107 | TRIM10   |         |       | 0.00214 | -1.39 |         |       | 0.00113 | 1.32  |
| 221651_x_at | 3514  | IGK@     |         |       | 0.00036 | 3.84  | 0.02313 | 2.19  |         |       |
| 221671_x_at | 3514  | IGK@     |         |       | 0.00030 | 3.97  | 0.02195 | 2.22  |         |       |
| 221875_x_at | 3134  | HLA-F    |         |       | 0.00075 | 1.55  | 0.01063 | 1.36  |         |       |
| 222056_s_at | 51011 | FAHD2A   | 0.01992 | 1.21  | 0.01091 | -1.35 | 0.00247 | -1.39 |         |       |
| 222065_s_at | 2314  | FLII     | 0.00380 | -1.29 |         |       | 0.00406 | 1.39  |         |       |
| 34210_at    | 1043  | CD52     |         |       | 0.00011 | 2.13  | 0.00918 | 1.59  |         |       |
| 34868_at    | 23381 | SMG5     | 0.02385 | -1.13 |         |       | 0.00381 | 1.22  |         |       |
| 46665_at    | 54910 | SEMA4C   |         |       | 0.00356 | 1.30  | 0.01538 | 1.22  |         |       |

**Supplemental Table 5** – List of biological processes identified by ToppGene. Gene ontology categories with identical redundant gene lists have been removed.

| Name                                                   | p-value  | Hit Count in Query | Hit Count in Genome | Hit in Query List                                                                                                                                                                                                            |
|--------------------------------------------------------|----------|--------------------|---------------------|------------------------------------------------------------------------------------------------------------------------------------------------------------------------------------------------------------------------------|
| <b>nDGF<sub>lo</sub> vs nDGF<sub>hi</sub></b>          |          |                    |                     |                                                                                                                                                                                                                              |
| intracellular transport                                | 1.68E-02 | 14                 | 867                 | M6PR,RHOA,PRDX1,NAPA,HSPA9,SEC23B,UBR5,SRSF9,SRSF1,SNX1,ARF1,VAMP3,LMAN1,CLTC                                                                                                                                                |
| cellular protein localization                          | 2.96E-02 | 11                 | 609                 | M6PR,RHOA,PRDX1,SYNE2,NAPA,HSPA9,SEC23B,UBR5,RALB,SNX1,CLTC                                                                                                                                                                  |
| Golgi vesicle transport                                | 3.31E-02 | 6                  | 149                 | NAPA,SEC23B,SNX1,ARF1,LMAN1,CLTC                                                                                                                                                                                             |
| <b>DGF<sub>lo</sub> vs DGF<sub>hi</sub></b>            |          |                    |                     |                                                                                                                                                                                                                              |
| interferon-gamma-mediated signaling pathway            | 5.48E-13 | 13                 | 72                  | IRF8,HLA-G,HLA-F,HLA-E,HLA-DRB1,HLA-DRA,HLA-DPB1,HLA-DPA1,HLA-DQB1,HLA-DQA1,HLA-B,CD44,HLA-DMA                                                                                                                               |
| antigen processing and presentation                    | 5.48E-13 | 13                 | 74                  | PSMB8,FCGR2B,HLA-G,HLA-F,HLA-E,HLA-DRB1,HLA-DRA,HLA-DPB1,HLA-DPA1,HLA-DQB1,HLA-DQA1,HLA-B,HLA-DMA                                                                                                                            |
| cytokine-mediated signaling pathway                    | 1.18E-12 | 18                 | 234                 | PSMB8,IL7R,IRF8,ISG20,PTPRC,STAT3,HLA-G,HLA-F,HLA-E,HLA-DRB1,HLA-DRA,HLA-DPB1,HLA-DPA1,HLA-DQB1,HLA-DQA1,HLA-B,CD44,HLA-DMA                                                                                                  |
| immune response                                        | 2.58E-12 | 29                 | 886                 | IGKV4-1,IL7R,FCGR2B,CXCL6,CCL19,CCL5,IGJ,IRF8,ITGB2,CD14,CD3D,LAT2,PTPRC,CFH,HLA-G,HLA-F,HLA-E,HLA-DRB1,HLA-DRA,DEFB1,MMP7,HLA-DPB1,FCGR2C,HLA-DPA1,HLA-DQB1,HLA-DQA1,HLA-B,TRBC1,HLA-DMA                                    |
| immune system process                                  | 1.07E-11 | 35                 | 1450                | IGKV4-1,PSMB8,TIMP1,IL7R,FCGR2B,TRIM10,CXCL6,CCL19,CCL5,IGJ,CXCR4,IRF8,ITGB2,CD14,CD3D,LAT2,PTPRC,CFH,HLA-G,HLA-F,HLA-E,HLA-DRB1,HLA-DRA,DEFB1,MMP7,HLA-DPB1,FCGR2C,HLA-DPA1,HLA-DQB1,HLA-DQA1,HLA-B,CD48,CD44,TRBC1,HLA-DMA |
| regulation of immune response                          | 3.57E-10 | 20                 | 447                 | IGKV4-1,IL7R,FCGR2B,ITGB2,CD3D,LAT2,PTPRC,CFH,HLA-G,HLA-F,HLA-E,HLA-DRB1,HLA-DRA,HLA-DPB1,HLA-DPA1,HLA-DQB1,HLA-DQA1,HLA-B,TRBC1,HLA-DMA                                                                                     |
| antigen processing and presentation of peptide antigen | 5.66E-10 | 9                  | 38                  | FCGR2B,HLA-G,HLA-F,HLA-E,HLA-DRB1,HLA-DQB1,HLA-DQA1,HLA-B,HLA-DMA                                                                                                                                                            |

|                                                                                           |          |    |     |                                                                                                                                                                 |
|-------------------------------------------------------------------------------------------|----------|----|-----|-----------------------------------------------------------------------------------------------------------------------------------------------------------------|
| antigen processing and presentation of peptide or polysaccharide antigen via MHC class II | 7.13E-10 | 8  | 25  | FCGR2B,HLA-DRB1,HLA-DRA,HLA-DPB1,HLA-DPA1,HLA-DQB1,HLA-DQA1,HLA-DMA                                                                                             |
| regulation of response to stimulus                                                        | 1.23E-08 | 24 | 847 | IGKV4-1,IL7R,FCGR2B,CCL5,CXCR4,ITGB2,CD3D,SEMA4C,LAT2,PTPRC,CFH,HLA-G,HLA-F,HLA-E,HLA-DRB1,HLA-DRA,HLA-DPB1,HLA-DPA1,HLA-DQB1,HLA-DQA1,HLA-B,CD44,TRBC1,HLA-DMA |
| regulation of immune system process                                                       | 1.71E-08 | 22 | 710 | IGKV4-1,IL7R,FCGR2B,CCL5,ITGB2,CD3D,LAT2,PTPRC,CFH,HLA-G,HLA-F,HLA-E,HLA-DRB1,HLA-DRA,HLA-DPB1,HLA-DPA1,HLA-DQB1,HLA-DQA1,HLA-B,CD44,TRBC1,HLA-DMA              |
| antigen receptor-mediated signaling pathway                                               | 1.75E-08 | 11 | 111 | CD3D,LAT2,PTPRC,HLA-DRB1,HLA-DRA,HLA-DPB1,HLA-DPA1,HLA-DQB1,HLA-DQA1,TRBC1,HLA-DMA                                                                              |
| T cell activation                                                                         | 3.55E-08 | 15 | 292 | IL7R,CXCR4,ITGB2,CD3D,PTPRC,HLA-G,HLA-DRB1,HLA-DRA,HLA-DPB1,HLA-DPA1,HLA-DQB1,HLA-DQA1,CD48,TRBC1,HLA-DMA                                                       |
| T cell receptor signaling pathway                                                         | 3.55E-08 | 10 | 89  | CD3D,PTPRC,HLA-DRB1,HLA-DRA,HLA-DPB1,HLA-DPA1,HLA-DQB1,HLA-DQA1,TRBC1,HLA-DMA                                                                                   |
| lymphocyte activation                                                                     | 5.37E-08 | 17 | 421 | IL7R,FCGR2B,CXCR4,ITGB2,CD3D,LAT2,PTPRC,HLA-G,HLA-DRB1,HLA-DRA,HLA-DPB1,HLA-DPA1,HLA-DQB1,HLA-DQA1,CD48,TRBC1,HLA-DMA                                           |
| lymphocyte costimulation                                                                  | 7.64E-08 | 9  | 70  | CD3D,HLA-DRB1,HLA-DRA,HLA-DPB1,HLA-DPA1,HLA-DQB1,HLA-DQA1,TRBC1,HLA-DMA                                                                                         |
| positive regulation of T cell activation                                                  | 2.17E-07 | 11 | 147 | IL7R,CD3D,PTPRC,HLA-DRB1,HLA-DRA,HLA-DPB1,HLA-DPA1,HLA-DQB1,HLA-DQA1,TRBC1,HLA-DMA                                                                              |
| antigen processing and presentation of exogenous peptide antigen                          | 3.00E-07 | 6  | 19  | FCGR2B,HLA-G,HLA-DRB1,HLA-DQB1,HLA-DQA1,HLA-DMA                                                                                                                 |
| cell activation                                                                           | 5.18E-07 | 20 | 720 | TIMP1,IL7R,FCGR2B,CXCR4,ITGB2,CD3D,RAC2,LAT2,PTPRC,HLA-G,EGF,HLA-DRB1,HLA-DRA,HLA-DPB1,HLA-DPA1,HLA-DQB1,HLA-DQA1,CD48,TRBC1,HLA-DMA                            |
| activation of immune response                                                             | 6.03E-07 | 13 | 260 | IGKV4-1,CD3D,LAT2,PTPRC,CFH,HLA-DRB1,HLA-DRA,HLA-DPB1,HLA-DPA1,HLA-DQB1,HLA-DQA1,TRBC1,HLA-DMA                                                                  |
| positive regulation of immune response                                                    | 8.40E-07 | 14 | 324 | IGKV4-1,CD3D,LAT2,PTPRC,CFH,HLA-G,HLA-DRB1,HLA-DRA,HLA-DPB1,HLA-DPA1,HLA-DQB1,HLA-DQA1,TRBC1,HLA-DMA                                                            |
| positive regulation of response to stimulus                                               | 1.86E-06 | 16 | 477 | IGKV4-1,CCL5,CD3D,SEMA4C,LAT2,PTPRC,CFH,HLA-G,HLA-DRB1,HLA-DRA,HLA-DPB1,HLA-DPA1,HLA-DQB1,HLA-DQA1,TRBC1,HLA-DMA                                                |

|                                                                                   |          |    |      |                                                                                                                           |
|-----------------------------------------------------------------------------------|----------|----|------|---------------------------------------------------------------------------------------------------------------------------|
| positive regulation of immune system process                                      | 1.90E-06 | 16 | 479  | IGKV4-1,IL7R,CCL5,CD3D,LAT2,PTPRC,CFH,HLA-G,HLA-DRB1,HLA-DRA,HLA-DPB1,HLA-DPA1,HLA-DQB1,HLA-DQA1,TRBC1,HLA-DMA            |
| antigen processing and presentation of exogenous peptide antigen via MHC class II | 2.00E-06 | 5  | 13   | FCGR2B,HLA-DRB1,HLA-DQB1,HLA-DQA1,HLA-DMA                                                                                 |
| regulation of lymphocyte activation                                               | 3.00E-06 | 12 | 249  | IL7R,FCGR2B,CD3D,PTPRC,HLA-DRB1,HLA-DRA,HLA-DPB1,HLA-DPA1,HLA-DQB1,HLA-DQA1,TRBC1,HLA-DMA                                 |
| defense response                                                                  | 3.02E-06 | 21 | 905  | IGKV4-1,FCGR2B,CXCL6,CCL19,CCL5,CXCR4,FAIM3,IRF8,ITGB2,CD14,TPSB2,PTPRC,CFH,STAT3,HLA-G,DEFB1,TPSAB1,MMP7,HLA-B,CD48,CD44 |
| type I interferon-mediated signaling pathway                                      | 2.39E-05 | 7  | 69   | PSMB8,IRF8,ISG20,HLA-G,HLA-F,HLA-E,HLA-B                                                                                  |
| antigen processing and presentation of peptide antigen via MHC class I            | 1.26E-03 | 4  | 21   | HLA-G,HLA-F,HLA-E,HLA-B                                                                                                   |
| response to wounding                                                              | 1.79E-03 | 18 | 1024 | TIMP1,MYOF,FCGR2B,CXCL6,CCL19,CCL5,CXCR4,ITGB2,CD14,TPSB2,RAC2,NRG1,CFH,STAT3,VCAN,EGF,CD48,CD44                          |
| inflammatory response                                                             | 3.27E-03 | 11 | 412  | FCGR2B,CXCL6,CCL19,CCL5,CXCR4,ITGB2,CD14,TPSB2,CFH,STAT3,CD44                                                             |
| positive thymic T cell selection                                                  | 3.37E-03 | 3  | 9    | CD3D,PTPRC,HLA-DMA                                                                                                        |
| humoral immune response                                                           | 8.57E-03 | 6  | 114  | IGKV4-1,FCGR2B,IGJ,PTPRC,CFH,MMP7                                                                                         |
| response to other organism                                                        | 8.97E-03 | 11 | 464  | FCGR2B,CCL19,CCL5,CXCR4,IRF8,CD14,ISG20,PTPRC,HLA-G,DEFB1,MMP7                                                            |
| negative regulation of leukocyte mediated immunity                                | 1.60E-02 | 3  | 15   | IL7R,FCGR2B,PTPRC                                                                                                         |
| positive regulation of T cell differentiation                                     | 2.13E-02 | 4  | 44   | IL7R,PTPRC,HLA-DQA1,HLA-DMA                                                                                               |
| regulation of T cell mediated cytotoxicity                                        | 2.15E-02 | 3  | 17   | IL7R,PTPRC,HLA-G                                                                                                          |
| leukocyte mediated immunity                                                       | 2.53E-02 | 7  | 206  | IGKV4-1,IL7R,FCGR2B,LAT2,PTPRC,HLA-G,HLA-DMA                                                                              |
| negative regulation of T cell mediated cytotoxicity                               | 3.65E-02 | 2  | 4    | IL7R,PTPRC                                                                                                                |
| T cell differentiation in thymus                                                  | 4.77E-02 | 4  | 57   | IL7R,CD3D,PTPRC,HLA-DMA                                                                                                   |
| regulation of humoral immune response                                             | 4.77E-02 | 3  | 23   | FCGR2B,PTPRC,CFH                                                                                                          |
| <b>DGF<sub>10</sub> vs nDGF<sub>10</sub></b>                                      |          |    |      |                                                                                                                           |
| interferon-gamma-mediated signaling pathway                                       | 3.94E-11 | 12 | 72   | HSP90AB1,IRF8,HLA-G,HLA-E,HLA-DRB1,HLA-DRA,HLA-DPB1,HLA-DPA1,HLA-DQB1,HLA-DQA1,HLA-B,HLA-DMA                              |

|                                                                                           |          |    |      |                                                                                                                                                         |
|-------------------------------------------------------------------------------------------|----------|----|------|---------------------------------------------------------------------------------------------------------------------------------------------------------|
| antigen processing and presentation                                                       | 3.94E-11 | 12 | 74   | PSMB8,PSME1,HLA-G,HLA-E,HLA-DRB1,HLA-DRA,HLA-DPB1,HLA-DPA1,HLA-DQB1,HLA-DQA1,HLA-B,HLA-DMA                                                              |
| cytokine-mediated signaling pathway                                                       | 4.75E-11 | 17 | 234  | PSMB8,HSP90AB1,IRF8,IFI35,ISG20,STAT3,HLA-G,IP6K2,HLA-E,HLA-DRB1,HLA-DRA,HLA-DPB1,HLA-DPA1,HLA-DQB1,HLA-DQA1,HLA-B,HLA-DMA                              |
| antigen processing and presentation of peptide or polysaccharide antigen via MHC class II | 1.51E-07 | 7  | 25   | HLA-DRB1,HLA-DRA,HLA-DPB1,HLA-DPA1,HLA-DQB1,HLA-DQA1,HLA-DMA                                                                                            |
| type I interferon-mediated signaling pathway                                              | 3.16E-07 | 9  | 69   | PSMB8,HSP90AB1,IRF8,IFI35,ISG20,HLA-G,IP6K2,HLA-E,HLA-B                                                                                                 |
| antigen processing and presentation of peptide antigen                                    | 2.48E-06 | 7  | 38   | HLA-G,HLA-E,HLA-DRB1,HLA-DQB1,HLA-DQA1,HLA-B,HLA-DMA                                                                                                    |
| antigen processing and presentation of exogenous antigen                                  | 4.57E-06 | 6  | 24   | PSME1,HLA-G,HLA-DRB1,HLA-DQB1,HLA-DQA1,HLA-DMA                                                                                                          |
| antigen processing and presentation of exogenous peptide antigen                          | 6.61E-05 | 5  | 19   | HLA-G,HLA-DRB1,HLA-DQB1,HLA-DQA1,HLA-DMA                                                                                                                |
| antigen processing and presentation of exogenous peptide antigen via MHC class II         | 5.37E-04 | 4  | 13   | HLA-DRB1,HLA-DQB1,HLA-DQA1,HLA-DMA                                                                                                                      |
| immune response                                                                           | 1.31E-03 | 18 | 886  | DDOST,CXCL6,IRF8,PRDX1,IFI35,CFH,HLA-G,HLA-E,HLA-DRB1,HLA-DRA,DEFB1,HLA-DPB1,FCGR2C,HLA-DPA1,HLA-DQB1,HLA-DQA1,HLA-B,HLA-DMA                            |
| immune system process                                                                     | 2.48E-03 | 23 | 1450 | PSMB8,PSME1,DDOST,MYO1E,MSN,CXCL6,ARF1,IRF8,PRDX1,IFI35,CFH,HLA-G,HLA-E,HLA-DRB1,HLA-DRA,DEFB1,HLA-DPB1,FCGR2C,HLA-DPA1,HLA-DQB1,HLA-DQA1,HLA-B,HLA-DMA |
| T cell activation                                                                         | 1.87E-02 | 9  | 292  | DDOST,HLA-G,HLA-DRB1,HLA-DRA,HLA-DPB1,HLA-DPA1,HLA-DQB1,HLA-DQA1,HLA-DMA                                                                                |
| regulation of immune response                                                             | 1.91E-02 | 11 | 447  | CFH,HLA-G,HLA-E,HLA-DRB1,HLA-DRA,HLA-DPB1,HLA-DPA1,HLA-DQB1,HLA-DQA1,HLA-B,HLA-DMA                                                                      |
| positive regulation of immune response                                                    | 3.79E-02 | 9  | 324  | CFH,HLA-G,HLA-DRB1,HLA-DRA,HLA-DPB1,HLA-DPA1,HLA-DQB1,HLA-DQA1,HLA-DMA                                                                                  |
| activation of immune response                                                             | 4.15E-02 | 8  | 260  | CFH,HLA-DRB1,HLA-DRA,HLA-DPB1,HLA-DPA1,HLA-DQB1,HLA-DQA1,HLA-DMA                                                                                        |
| <b>DGF<sub>hi</sub> vs nDGF<sub>hi</sub></b>                                              |          |    |      |                                                                                                                                                         |
| No biological processes identified                                                        |          |    |      |                                                                                                                                                         |
